# Supplementary material
Source: publisher site journal article supplement (http://www.kjim.org/upload/media/kjim-2022-183-Supplementary-Fig-4.pdf)
Supplement: Supplementary file 1 [file kjim-2022-183-Supplementary-Fig-4.pdf]

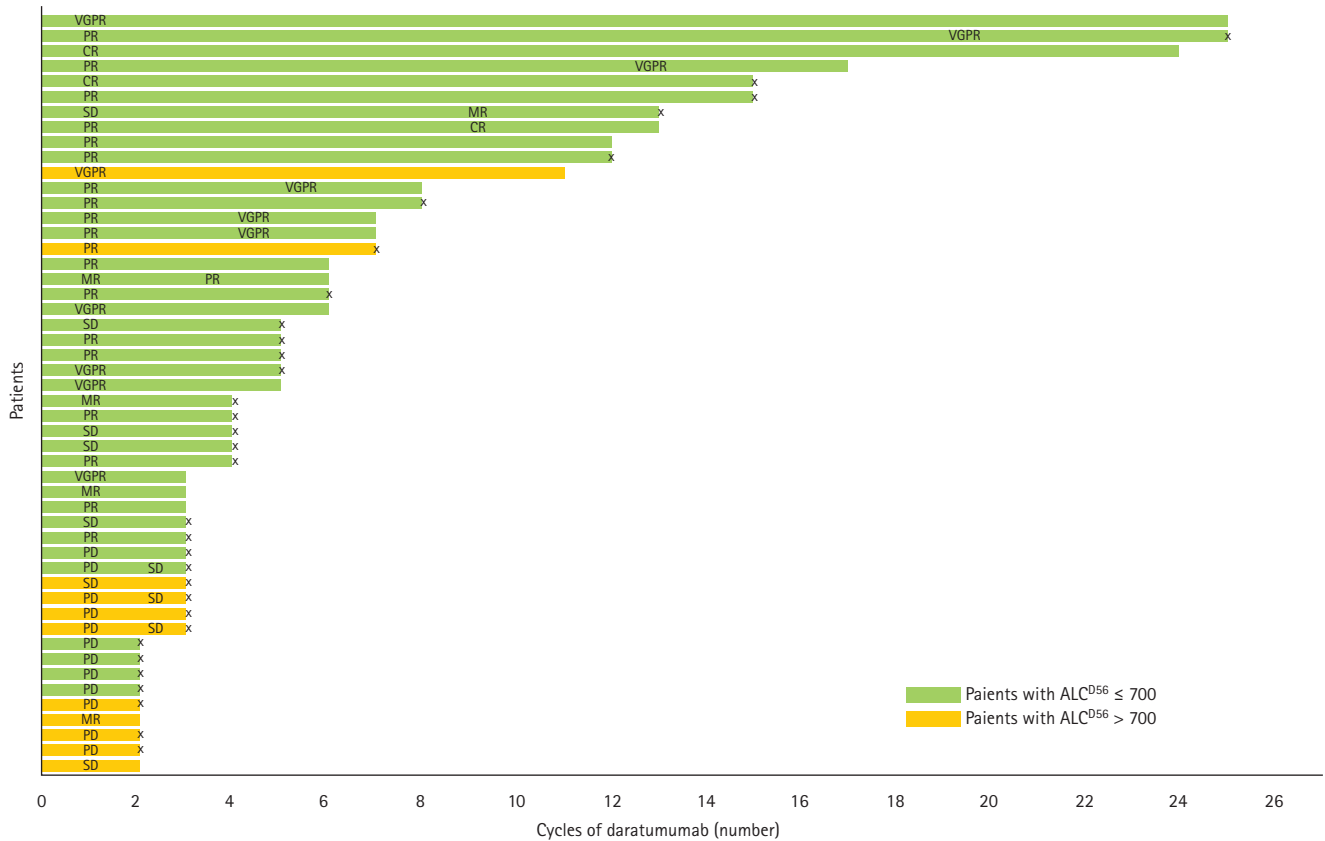

**Supplementary Figure 4.** Swimmer plot of all patients with treatment response. Responses shown on the left side indicate the initial responses after the second cycle of daratumumab treatment. Responses shown on the right side indicate the best response during the course of daratumumab treatment. X indicates disease progression, which is a result of treatment withdrawal.  $ALC^{D56}$ , absolute lymphocyte counts at the day prior to the third cycle of daratumumab; VGPR, very good partial response; PR, partial response; CR, complete response; SD, stable disease; MR, minimal response; PD, progressive disease.
